# Supplementary material
Source: PubMed Central journal article supplement (PMC4192013)
Supplement: NIHMS626292-supplement.pdf [file NIHMS626292-supplement.pdf]

**Supplement for:**

Restricted motion of the conserved  
immunoglobulin G1 N-glycan  
is essential for efficient FcγRIIIa binding

Ganesh P. Subedi, Quinlin M. Hanson, Adam W. Barb\*

Roy J. Carver Department of Biochemistry, Biophysics and Molecular Biology

Iowa State University, Ames, IA 50011

| Glycoform                                                                                       | Monoisotopic Mass + Na <sup>+</sup> (m/z) | Relative Abundance (%) |       |       |       |       |       |                |                |
|-------------------------------------------------------------------------------------------------|-------------------------------------------|------------------------|-------|-------|-------|-------|-------|----------------|----------------|
|                                                                                                 |                                           | WT                     | K246F | F241I | F241S | F243I | F243S | F241I<br>F243I | F241S<br>F243S |
| M5N2           | 1345                                      |                        |       |       |       |       |       | 2.01           | 2.60           |
| NM3N2F         | 1591                                      |                        | 5.68  |       |       |       | 7.93  | 2.85           | 2.97           |
| G0F            | 1836                                      | 73.18                  | 73.58 | 35.31 | 20.2  | 18.41 | 27.39 | 8.63           | 10.42          |
| M7N2           | 1988                                      |                        |       |       |       |       |       | 0.83           | 1.68           |
| G1F            | 2040                                      | 23.85                  | 15.94 | 21.16 | 8.67  | 13.39 | 16.42 | 5.31           | 3.37           |
| G2             | 2070                                      |                        |       |       | 2.87  | 2.92  |       |                |                |
| N3M3N2F        | 2081                                      |                        |       | 8.41  | 7.14  | 6.26  | 9.62  | 2.93           | 4.04           |
| M8N2           | 2192                                      |                        |       |       |       |       |       | 1.49           |                |
| Unidentified                                                                                    | 2232                                      |                        |       |       |       |       |       | 1.52           | 3.22           |
| G2F            | 2244                                      | 2.98                   | 2.56  | 20.71 | 11.76 | 10.16 | 12.7  | 6.47           | 4.14           |
| G1N3M3N2F      | 2285                                      |                        | 2.24  | 7.99  | 10.85 | 12.15 | 7.53  | 5.18           | 2.97           |
| A1G1F          | 2404                                      |                        |       |       |       |       |       | 3.57           | 3.22           |
| G2F2           | 2418                                      |                        |       |       | 5.28  | 5.21  | 3.9   | 2.46           | 2.89           |
| A1G2N3M3N      | 2432                                      |                        |       |       |       |       |       | 1.04           | 1.74           |
| G2N3M3N2F      | 2489                                      |                        |       |       |       | 4.03  | 5.35  | 3.87           | 2.89           |
| A1G1N1M5N2F  | 2564                                      |                        |       |       |       |       |       | 1.00           | 3.64           |
| A1G2F        | 2605                                      |                        |       | 6.42  | 9.22  | 9.96  | 9.16  | 11.35          | 5.76           |
| A1G3N3M3N    | 2636                                      |                        |       |       |       |       |       | 2.50           | 2.52           |
| A1G1N3M3N2F  | 2646                                      |                        |       |       |       |       |       | 2.80           | 2.85           |
| G2N3M3N2F2   | 2663                                      |                        |       |       | 4.58  | 2.6   |       | 1.43           | 1.67           |
| G3N3M3N2F    | 2693                                      |                        |       |       |       |       |       | 2.77           | 2.11           |
| A1G2F2       | 2780                                      |                        |       |       | 5.49  | 4.21  |       | 3.45           | 4.83           |
| A2G2         | 2793                                      |                        |       |       |       |       |       | 1.44           | 3.01           |
| A1G2N3M3N2F  | 2851                                      |                        |       |       | 4.91  | 3.21  |       | 2.63           | 3.38           |
| A2G2F        | 2967                                      |                        |       |       | 9.04  | 7.49  |       | 9.23           | 11.10          |
| A2G3N3M3N    | 2997                                      |                        |       |       |       |       |       | 2.29           | 3.53           |
| A2G2N3M3N2   | 3038                                      |                        |       |       |       |       |       | 2.55           | 2.46           |
| A1G3N3M3N2F  | 3055                                      |                        |       |       |       |       |       | 2.99           | 2.49           |
| A2G2N3M3N2F  | 3212                                      |                        |       |       |       |       |       | 1.46           |                |
| A2G3N3M3N2F  | 3416                                      |                        |       |       |       |       |       | 2.50           | 2.57           |
| A3G3N3M3N2F  | 3777                                      |                        |       |       |       |       |       | 1.45           | 1.94           |

**Figure S1**, related to Figure 2. Relative abundance of Fc N-glycoforms as measured from the spectra presented in **Figure 2**.

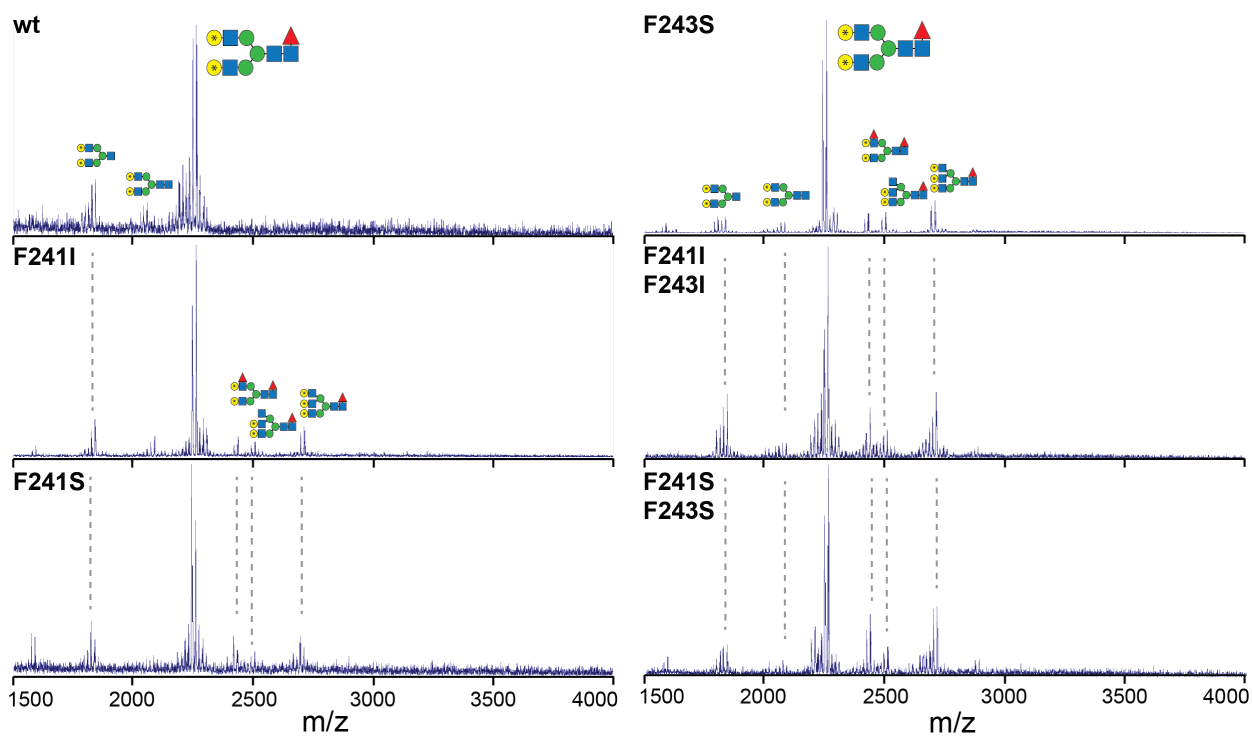

**Figure S2**, related to Figures 2 and 4. MALDI-MS of PNGaseF-released, permethylated N-glycans following in vitro remodeling to incorporate  $^{13}\text{C}_2$ -Gal (indicated by a “\*” within a *yellow circle*). Cartoon diagrams highlight potential configurations that fit the observed masses and known N-glycan structures; isobaric ions were not distinguished. Two peaks corresponding to  $\text{Na}^+$  and  $\text{K}^+$  adducts are observed for each species.

| Glycoform                                                                                         | Monoisotopic Mass + Na <sup>+</sup> (m/z) | Relative Abundance (%) |       |       |       |                |                |       |
|---------------------------------------------------------------------------------------------------|-------------------------------------------|------------------------|-------|-------|-------|----------------|----------------|-------|
|                                                                                                   |                                           | WT                     | F241I | F241S | F243S | F241I<br>F243I | F241S<br>F243S | K246F |
| i. G*2N2M3N      | 1827                                      | 20                     | 12    | 15    | 5     | 19             | 10             | 5     |
| ii. G*2N2M3N2    | 2072                                      | 6                      | 2     | 2     | 4     | 2              | 3              | 5     |
| iii. G*2N2M3N2F  | 2246                                      | 74                     | 66    | 56    | 69    | 46             | 50             | 90    |
| G*2N2FM3N2F      | 2420                                      |                        | 5     | 11    | 6     | 10             | 15             |       |
| G*2N3M3N2F       | 2491                                      |                        | 4     | 5     | 5     | 8              | 6              |       |
| G*3N3M3N2F       | 2697                                      |                        | 11    | 11    | 11    | 15             | 16             |       |
|                                                                                                   |                                           |                        |       |       |       |                |                |       |
| i + iii (total G2F)                                                                               |                                           | 94                     | 78    | 71    | 74    | 65             | 60             | 95    |
| i + ii + iii (total with two Gal-termini)                                                         |                                           | 100                    | 80    | 73    | 78    | 67             | 63             | 100   |

**Figure S3**, related to Figures 2,4 and S2. Relative abundance of Fc N-glycoforms following in vitro remodeling with [<sup>13</sup>C<sub>2</sub>]-Gal as measured from the spectra presented in **Figure S2**.

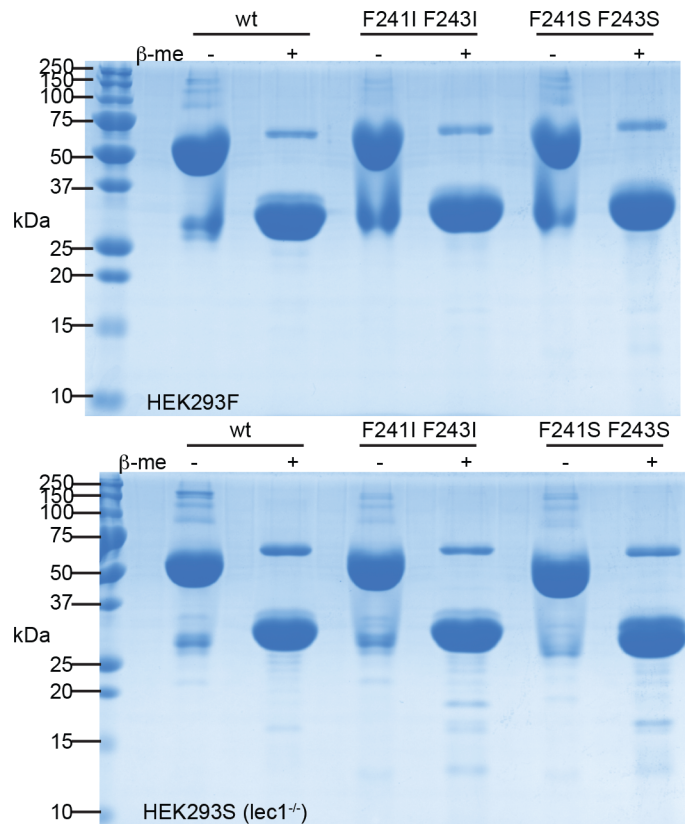

**Figure S4**, related to Figures 3 and 4. Hinge disulfides formed stabilize Fc dimers (expt ~55 kDa) expressed from both HEK293F and HEK293S(*lec1<sup>-/-</sup>*) cells. The covalently-linked C $\gamma$ 2, C $\gamma$ 3 domains and N-glycan that compose the Fc monomer have a combined mass of ~27.5 kDa and are observed in an SDS-PAGE gel when 1 mM beta-mercaptoethanol ( $\beta$ -me) is included in the sample preparation buffer.

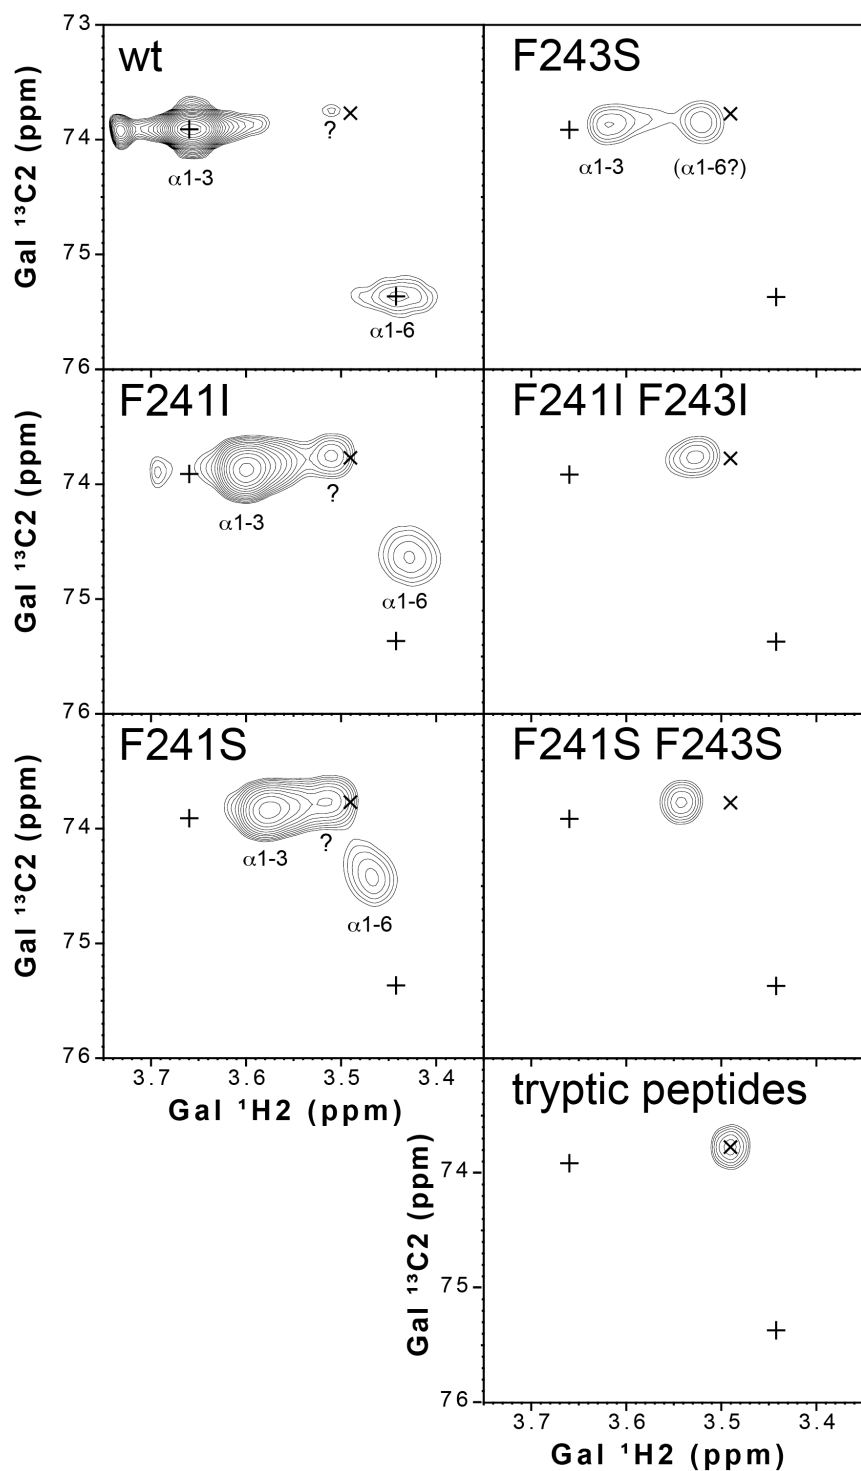

**Figure S5**, related to Figure 4.  $^1\text{H}$ - $^{13}\text{C}$  HSQC spectra of Fc mutants collected at  $50^\circ\text{C}$  following enzymatic remodeling to incorporate  $^{13}\text{C}2$ -Gal. Positions of wild type coherences are highlighted in each spectrum with "+" signs, and the position of coherences following trypsin proteolysis are marked with "x". Peaks labeled by "?" have not been identified, but are present in wild type. These peaks are very narrow and intense, but according to 1d  $^{13}\text{C}$  NMR spectroscopy only represent a small fraction of the total  $^{13}\text{C}$  signal.

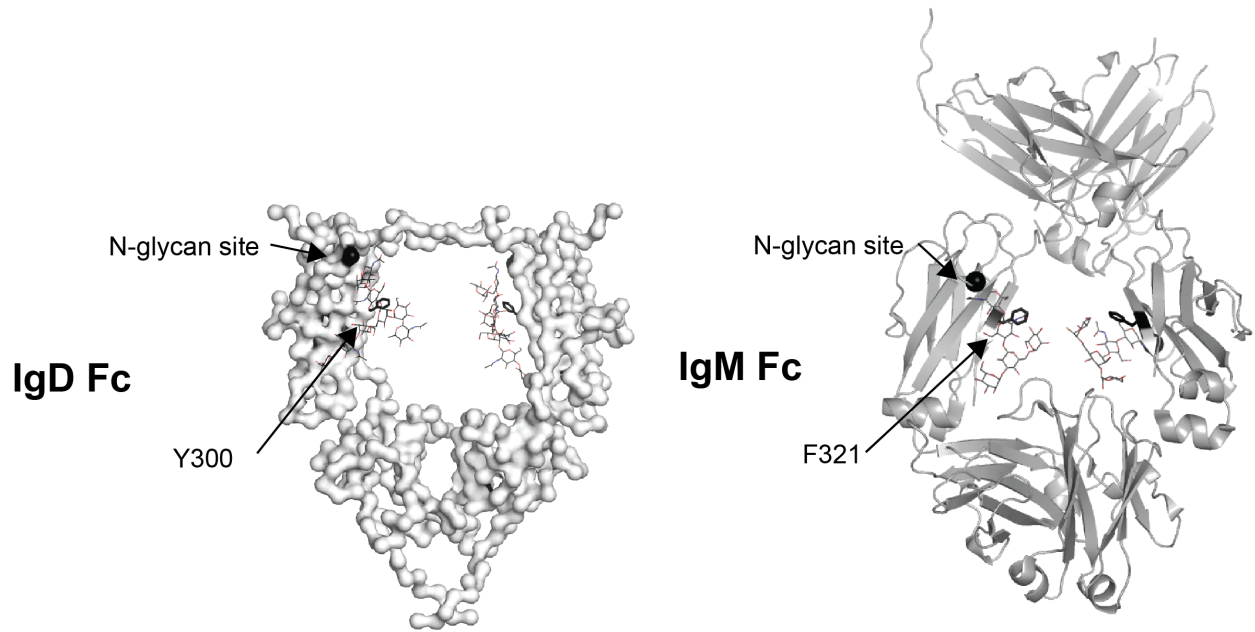

**Figure S6**, related to Figure 7. Models of IgD and IgM Fc show the position of conserved N-glycosylation sites and aromatic residues. The IgD figure was generated from solution scattering data (pdb 1zvo (Sun et al., 2005)) and IgM upon x-ray scattering, crystallography and NMR data (Muller et al., 2013; Perkins et al., 1991).

### Supplement References

- Muller, R., Grawert, M.A., Kern, T., Madl, T., Peschek, J., Sattler, M., Groll, M., and Buchner, J. (2013). High-resolution structures of the IgM Fc domains reveal principles of its hexamer formation. *Proc Natl Acad Sci U S A* *110*, 10183-10188.
- Perkins, S.J., Nealis, A.S., Sutton, B.J., and Feinstein, A. (1991). Solution structure of human and mouse immunoglobulin M by synchrotron X-ray scattering and molecular graphics modelling. A possible mechanism for complement activation. *J Mol Biol* *221*, 1345-1366.
- Sun, Z., Almogren, A., Furtado, P.B., Chowdhury, B., Kerr, M.A., and Perkins, S.J. (2005). Semi-extended solution structure of human myeloma immunoglobulin D determined by constrained X-ray scattering. *J Mol Biol* *353*, 155-173.
